# Supplementary material for: Successful Reconstruction of the Right Ventricular Outflow Tract by Implantation of Thymus Stem Cell Engineered Graft in Growing Swine
Source: PubMed Central journal article supplement (PMC6609916; doi:10.1016/j.jacbts.2019.02.001), 2019-06-24

ONLINE APPENDIX

**Online Supplementary Figure 1.** Schematic diagram showing all the steps and techniques performed in the study.

## Isolation of T-MSCs

- Digestion of newborn pig thymus
- Expansion of the obtained cell line
- Characterization of the T-MSCs by:
  - Flow Cytometry
  - Differentiation into three mesodermal lineages
  - Cytokine secretion
  - Interaction with cardiomyocytes

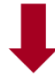

## Engineering of the SIS-ECM

- Seeding onto the scaffold
- 2 weeks culture under static and dynamic conditions
- Characterization of the graft
  - Cell attachment (SEM and Histology)
  - Cell viability (Live/Dead Assay)
  - Mechanical properties (Tensile Testing)

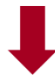

## In vivo implantation

Seeded or unseeded grafts were used to reconstruct the RVOT of a growing swine

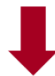

## Recovery of the animal

- 24-48 hours intensive care and 4.5 months of follow-up
  - Animal weight
  - Echocardiography
  - Cardiac magnetic imaging

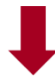

## Termination

- Harvesting of the implants for further analysis
  - Endothelialisation (SEM/Histology)
  - Cardiac regeneration (Histology, IF)
  - Vascularisation (IF)
  - Fibrosis (Histology, IF)

**Online Supplementary Figure 2.** Histological stains of the unseeded and seeded grafts. (a) Elastic van Gieson stain shows a collagen-rich tissue that constitute the graft side of the explants. The endocardial side also developed an endothelium containing a layer of elastin. (b) Von Kossa stain demonstrates lack of calcification in both the unseeded and seeded samples.

**a**

**Elastin van Gieson**

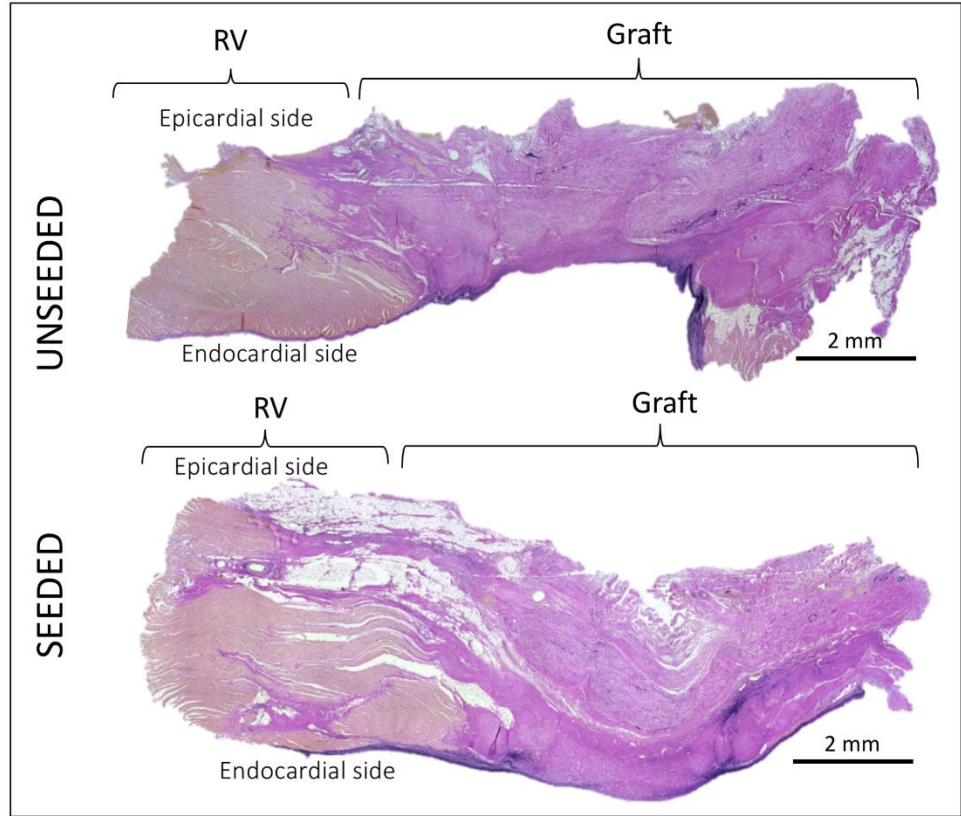

**b**

**Von Kossa**

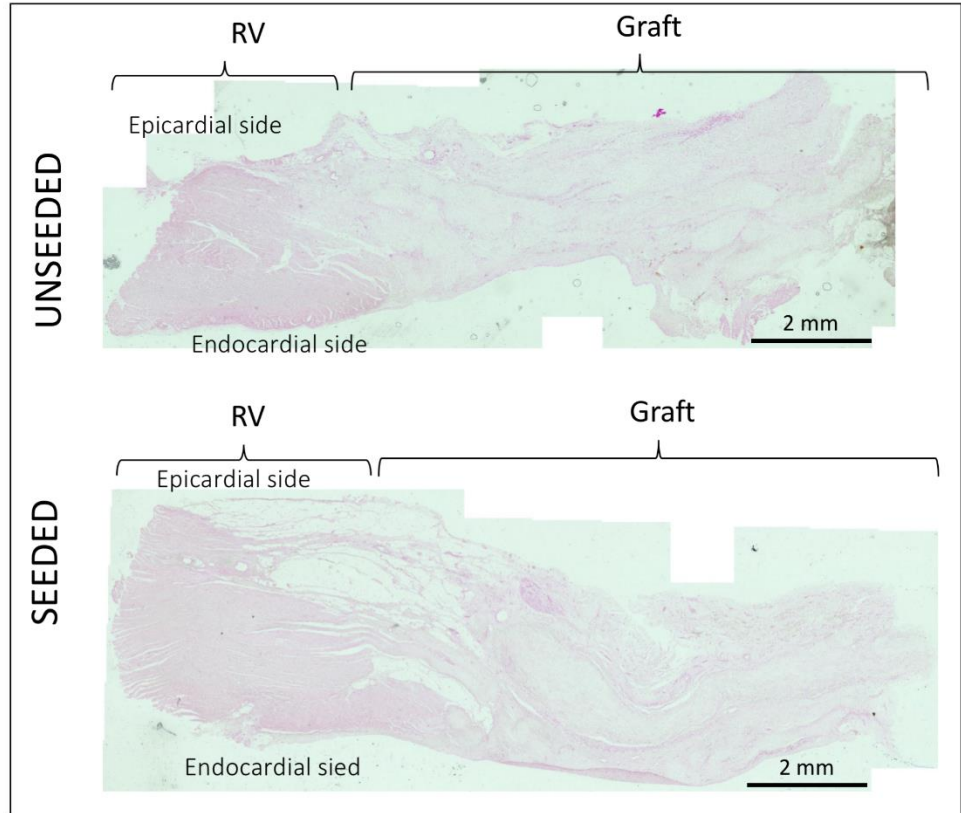

Supplement: mmc1.pdf [file mmc1.pdf]
